# Supplementary material for: PI3K and MAPK pathways mediate the BDNF/TrkB-increased metastasis in neuroblastoma
Source: Springer Nature journal article supplement (doi:10.1007/s13277-016-5433-z), 2016-10-17

Suppl. Fig. 2

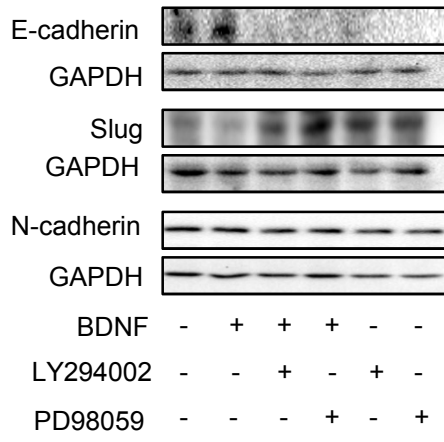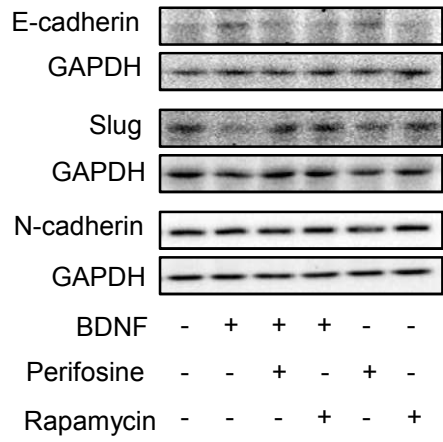

Supplement: MOESM2 [file 10883700]
